# Supplementary material for: Application Potential of Wastewater Fertigated Short Rotation Coppice Systems in a Selected Region (Aligarh, UP, India)
Source: MDPI journal article supplement (doi:10.3390/recycling8050075), 2023-09-29
Supplement: s1 [file s1]

## Supplementary Material

Supplementary Table S1: Surface requirement and the potential biomass yield per settlement

| Area_updat  | Name_Villa                  | Popul<br>ation | Area_<br>Bmin | Area_<br>Bmax | Area_<br>Wmin | Area_<br>Wmax | Area_<br>Pmin | Area_<br>Pmax | Yield_<br>Bmin | Yield_<br>Bmax | Yield_<br>Wmin | Yield_<br>Wmax | Yield_<br>_Pmi<br>n | Yield_<br>Pmax |
|-------------|-----------------------------|----------------|---------------|---------------|---------------|---------------|---------------|---------------|----------------|----------------|----------------|----------------|---------------------|----------------|
| 3404530.122 | Atrauli                     | 65334          | 17.97         | 60.76         | 17.97         | 111.72        | 17.97         | 167.91        | 485            | 1,641          | 153            | 950            | 180                 | 1,679          |
| 287690.1077 | Bhojpur<br>Rampur           | 8272           | 2.27          | 7.69          | 2.27          | 14.15         | 2.27          | 21.26         | 61             | 208            | 19             | 120            | 23                  | 213            |
| 204312.1464 | Chandiyana                  | 7906           | 2.17          | 7.35          | 2.17          | 13.52         | 2.17          | 20.32         | 59             | 199            | 18             | 115            | 22                  | 203            |
| 273958.8015 | Panahara                    | 7441           | 2.05          | 6.92          | 2.05          | 12.72         | 2.05          | 19.12         | 55             | 187            | 17             | 108            | 20                  | 191            |
| 306607.591  | Nahal<br>Chirauri Taluka    | 5679           | 1.56          | 5.28          | 1.56          | 9.71          | 1.56          | 14.60         | 42             | 143            | 13             | 83             | 16                  | 146            |
| 192699.5759 | Jargwan                     | 5506           | 1.51          | 5.12          | 1.51          | 9.42          | 1.51          | 14.15         | 41             | 138            | 13             | 80             | 15                  | 142            |
| 179368.7199 | Lahra Salempur<br>Inayatpur | 5498           | 1.51          | 5.11          | 1.51          | 9.40          | 1.51          | 14.13         | 41             | 138            | 13             | 80             | 15                  | 141            |
| 271921.0759 | Samaspur                    | 5358           | 1.47          | 4.98          | 1.47          | 9.16          | 1.47          | 13.77         | 40             | 135            | 13             | 78             | 15                  | 138            |
| 300452.9817 | Palimukimpur                | 5311           | 1.46          | 4.94          | 1.46          | 9.08          | 1.46          | 13.65         | 39             | 133            | 12             | 77             | 15                  | 136            |
| 336031.966  | Lohgarh                     | 5205           | 1.43          | 4.84          | 1.43          | 8.90          | 1.43          | 13.38         | 39             | 131            | 12             | 76             | 14                  | 134            |
| 241100.9245 | Barhesara                   | 5121           | 1.41          | 4.76          | 1.41          | 8.76          | 1.41          | 13.16         | 38             | 129            | 12             | 74             | 14                  | 132            |
| 200150.4364 | Naroopura Katka             | 4672           | 1.28          | 4.34          | 1.28          | 7.99          | 1.28          | 12.01         | 35             | 117            | 11             | 68             | 13                  | 120            |
| 291819.8343 | Harnot Bhojpur              | 4519           | 1.24          | 4.20          | 1.24          | 7.73          | 1.24          | 11.61         | 34             | 113            | 11             | 66             | 12                  | 116            |
| 142144.7724 | Dadar Alupura               | 4448           | 1.22          | 4.14          | 1.22          | 7.61          | 1.22          | 11.43         | 33             | 112            | 10             | 65             | 12                  | 114            |
| 193090.7998 | Rajmargpur                  | 4221           | 1.16          | 3.93          | 1.16          | 7.22          | 1.16          | 10.85         | 31             | 106            | 10             | 61             | 12                  | 108            |
| 254969.8396 | Badholi                     | 4220           | 1.16          | 3.92          | 1.16          | 7.22          | 1.16          | 10.85         | 31             | 106            | 10             | 61             | 12                  | 108            |
| 157416.5611 | Baharabad                   | 4190           | 1.15          | 3.90          | 1.15          | 7.16          | 1.15          | 10.77         | 31             | 105            | 10             | 61             | 12                  | 108            |
| 178438.0198 | Khedeia Rafatpur            | 4133           | 1.14          | 3.84          | 1.14          | 7.07          | 1.14          | 10.62         | 31             | 104            | 10             | 60             | 11                  | 106            |
| 258640.5143 | Gahtauli Nirmal             | 4108           | 1.13          | 3.82          | 1.13          | 7.02          | 1.13          | 10.56         | 31             | 103            | 10             | 60             | 11                  | 106            |
| 158008.4847 | Bidhipur                    | 4029           | 1.11          | 3.75          | 1.11          | 6.89          | 1.11          | 10.35         | 30             | 101            | 9              | 59             | 11                  | 104            |
| 147720.608  | Dudhma                      | 3948           | 1.09          | 3.67          | 1.09          | 6.75          | 1.09          | 10.15         | 29             | 99             | 9              | 57             | 11                  | 101            |
| 152215.3849 | Jakhaira                    | 3940           | 1.08          | 3.66          | 1.08          | 6.74          | 1.08          | 10.13         | 29             | 99             | 9              | 57             | 11                  | 101            |
| 156381.1771 | Baimbirpur                  | 3788           | 1.04          | 3.52          | 1.04          | 6.48          | 1.04          | 9.74          | 28             | 95             | 9              | 55             | 10                  | 97             |
| 295313.8961 | Jirauli Dhoom<br>Singh      | 3701           | 1.02          | 3.44          | 1.02          | 6.33          | 1.02          | 9.51          | 27             | 93             | 9              | 54             | 10                  | 95             |
| 179494.7028 | Dinapur                     | 3405           | 0.94          | 3.17          | 0.94          | 5.82          | 0.94          | 8.75          | 25             | 85             | 8              | 49             | 9                   | 88             |
| 148468.675  | Simthala                    | 3388           | 0.93          | 3.15          | 0.93          | 5.79          | 0.93          | 8.71          | 25             | 85             | 8              | 49             | 9                   | 87             |
| 281785.33   | Khedia Bahadur<br>Garhi     | 3361           | 0.92          | 3.13          | 0.92          | 5.75          | 0.92          | 8.64          | 25             | 84             | 8              | 49             | 9                   | 86             |
| 185941.804  | Datacholi Khurd             | 3329           | 0.92          | 3.10          | 0.92          | 5.69          | 0.92          | 8.56          | 25             | 84             | 8              | 48             | 9                   | 86             |
| 161994.4161 | Maupur Bhaupur              | 3312           | 0.91          | 3.08          | 0.91          | 5.66          | 0.91          | 8.51          | 25             | 83             | 8              | 48             | 9                   | 85             |
| 89251.39701 |                             | 3276           | 0.90          | 3.05          | 0.90          | 5.60          | 0.90          | 8.42          | 24             | 82             | 8              | 48             | 9                   | 84             |

|                    |                           |             |             |             |             |             |             |             |           |           |          |           |          |           |
|--------------------|---------------------------|-------------|-------------|-------------|-------------|-------------|-------------|-------------|-----------|-----------|----------|-----------|----------|-----------|
| 112897.9015        | Suratgarh                 | 3258        | 0.90        | 3.03        | 0.90        | 5.57        | 0.90        | 8.37        | 24        | 82        | 8        | 47        | 9        | 84        |
| 154231.5178        | Mohsanpur                 | 3219        | 0.89        | 2.99        | 0.89        | 5.50        | 0.89        | 8.27        | 24        | 81        | 8        | 47        | 9        | 83        |
| 187626.5824        | Nagla Harji               | 3109        | 0.85        | 2.89        | 0.85        | 5.32        | 0.85        | 7.99        | 23        | 78        | 7        | 45        | 9        | 80        |
| 147657.7564        | Kakethal                  | 3065        | 0.84        | 2.85        | 0.84        | 5.24        | 0.84        | 7.88        | 23        | 77        | 7        | 45        | 8        | 79        |
| 164299.0713        | Bahona Kotra              | 3056        | 0.84        | 2.84        | 0.84        | 5.23        | 0.84        | 7.85        | 23        | 77        | 7        | 44        | 8        | 79        |
| 155168.6464        | Dhurra Khas               | 3005        | 0.83        | 2.79        | 0.83        | 5.14        | 0.83        | 7.72        | 22        | 75        | 7        | 44        | 8        | 77        |
| 147558.2927        |                           | 2967        | 0.82        | 2.76        | 0.82        | 5.07        | 0.82        | 7.63        | 22        | 75        | 7        | 43        | 8        | 76        |
| 120494.1595        | Khanpur Khitauli          | 2925        | 0.80        | 2.72        | 0.80        | 5.00        | 0.80        | 7.52        | 22        | 73        | 7        | 43        | 8        | 75        |
| 146113.8369        |                           | 2871        | 0.79        | 2.67        | 0.79        | 4.91        | 0.79        | 7.38        | 21        | 72        | 7        | 42        | 8        | 74        |
| 162545.3581        | Raipur Khas               | 2809        | 0.77        | 2.61        | 0.77        | 4.80        | 0.77        | 7.22        | 21        | 71        | 7        | 41        | 8        | 72        |
| 150725.3308        | Datacholi Buzurg          | 2794        | 0.77        | 2.60        | 0.77        | 4.78        | 0.77        | 7.18        | 21        | 70        | 7        | 41        | 8        | 72        |
| 110870.0014        | Oreni Dalpatpur           | 2749        | 0.76        | 2.56        | 0.76        | 4.70        | 0.76        | 7.06        | 20        | 69        | 6        | 40        | 8        | 71        |
| 140683.1791        | Raipur Dalpatpur          | 2745        | 0.75        | 2.55        | 0.75        | 4.69        | 0.75        | 7.05        | 20        | 69        | 6        | 40        | 8        | 71        |
| 135914.3096        | Sankara<br>Ganeshpur      | 2687        | 0.74        | 2.50        | 0.74        | 4.59        | 0.74        | 6.91        | 20        | 67        | 6        | 39        | 7        | 69        |
| 156817.1972        | Govindpur                 | 2617        | 0.72        | 2.43        | 0.72        | 4.48        | 0.72        | 6.73        | 19        | 66        | 6        | 38        | 7        | 67        |
| 0                  |                           | 2583        | 0.71        | 2.40        | 0.71        | 4.42        | 0.71        | 6.64        | 19        | 65        | 6        | 38        | 7        | 66        |
| 70992.77492        | Alipur                    | 2552        | 0.70        | 2.37        | 0.70        | 4.36        | 0.70        | 6.56        | 19        | 64        | 6        | 37        | 7        | 66        |
| <b>129948.2989</b> | <b>Kasimpur Nagla</b>     | <b>2516</b> | <b>0.69</b> | <b>2.34</b> | <b>0.69</b> | <b>4.30</b> | <b>0.69</b> | <b>6.47</b> | <b>19</b> | <b>63</b> | <b>6</b> | <b>37</b> | <b>7</b> | <b>65</b> |
| 161920.7783        | Salarpur                  | 2483        | 0.68        | 2.31        | 0.68        | 4.25        | 0.68        | 6.38        | 18        | 62        | 6        | 36        | 7        | 64        |
| 75070.85202        | Harvanshpur<br>Panihara   | 2431        | 0.67        | 2.26        | 0.67        | 4.16        | 0.67        | 6.25        | 18        | 61        | 6        | 35        | 7        | 62        |
| 104779.8522        | Abdullapur                | 2362        | 0.65        | 2.20        | 0.65        | 4.04        | 0.65        | 6.07        | 18        | 59        | 6        | 34        | 6        | 61        |
| 80266.48349        | Pokharpur                 | 2348        | 0.65        | 2.18        | 0.65        | 4.02        | 0.65        | 6.03        | 17        | 59        | 5        | 34        | 6        | 60        |
| 131951.6739        | Ranmochna                 | 2304        | 0.63        | 2.14        | 0.63        | 3.94        | 0.63        | 5.92        | 17        | 58        | 5        | 33        | 6        | 59        |
| 139250.6662        | Pipli                     | 2293        | 0.63        | 2.13        | 0.63        | 3.92        | 0.63        | 5.89        | 17        | 58        | 5        | 33        | 6        | 59        |
| 141047.8161        |                           | 2287        | 0.63        | 2.13        | 0.63        | 3.91        | 0.63        | 5.88        | 17        | 57        | 5        | 33        | 6        | 59        |
| 68058.25337        | Ganeshpur                 | 2263        | 0.62        | 2.10        | 0.62        | 3.87        | 0.62        | 5.82        | 17        | 57        | 5        | 33        | 6        | 58        |
| 223479.9887        | Baijla                    | 2202        | 0.61        | 2.05        | 0.61        | 3.77        | 0.61        | 5.66        | 16        | 55        | 5        | 32        | 6        | 57        |
| 115989.5538        | Jamanpur<br>Todarpur Gair | 2102        | 0.58        | 1.95        | 0.58        | 3.59        | 0.58        | 5.40        | 16        | 53        | 5        | 31        | 6        | 54        |
| 114234.3406        | Ahatmali                  | 2097        | 0.58        | 1.95        | 0.58        | 3.59        | 0.58        | 5.39        | 16        | 53        | 5        | 30        | 6        | 54        |
| 86670.32247        | Chalakpur                 | 2075        | 0.57        | 1.93        | 0.57        | 3.55        | 0.57        | 5.33        | 15        | 52        | 5        | 30        | 6        | 53        |
| 121073.1063        | Kunvarpur                 | 2031        | 0.56        | 1.89        | 0.56        | 3.47        | 0.56        | 5.22        | 15        | 51        | 5        | 30        | 6        | 52        |
| 43475.34983        |                           | 2019        | 0.56        | 1.88        | 0.56        | 3.45        | 0.56        | 5.19        | 15        | 51        | 5        | 29        | 6        | 52        |
| 146980.3972        | Pilkhuni                  | 2001        | 0.55        | 1.86        | 0.55        | 3.42        | 0.55        | 5.14        | 15        | 50        | 5        | 29        | 6        | 51        |
| 104462.1333        | Mahgavan                  | 1973        | 0.54        | 1.83        | 0.54        | 3.37        | 0.54        | 5.07        | 15        | 50        | 5        | 29        | 5        | 51        |

|             |                 |      |      |      |      |      |      |      |    |    |   |    |   |    |
|-------------|-----------------|------|------|------|------|------|------|------|----|----|---|----|---|----|
| 141177.9974 | Kasimpur Nagri  | 1941 | 0.53 | 1.81 | 0.53 | 3.32 | 0.53 | 4.99 | 14 | 49 | 5 | 28 | 5 | 50 |
| 82410.2522  | Usmanpur        | 1893 | 0.52 | 1.76 | 0.52 | 3.24 | 0.52 | 4.87 | 14 | 48 | 4 | 28 | 5 | 49 |
| 221903.8875 | Kaliyanpur      | 1857 | 0.51 | 1.73 | 0.51 | 3.18 | 0.51 | 4.77 | 14 | 47 | 4 | 27 | 5 | 48 |
| 113240.4134 | Bhagirathpur    | 1827 | 0.50 | 1.70 | 0.50 | 3.12 | 0.50 | 4.70 | 14 | 46 | 4 | 27 | 5 | 47 |
| 93724.01741 |                 | 1806 | 0.50 | 1.68 | 0.50 | 3.09 | 0.50 | 4.64 | 13 | 45 | 4 | 26 | 5 | 46 |
| 80817.65706 | Pyavali         | 1801 | 0.50 | 1.67 | 0.50 | 3.08 | 0.50 | 4.63 | 13 | 45 | 4 | 26 | 5 | 46 |
| 0           | Nauari          | 1799 | 0.49 | 1.67 | 0.49 | 3.08 | 0.49 | 4.62 | 13 | 45 | 4 | 26 | 5 | 46 |
| 74507.51982 |                 | 1752 | 0.48 | 1.63 | 0.48 | 3.00 | 0.48 | 4.50 | 13 | 44 | 4 | 25 | 5 | 45 |
| 26156.97187 | Nathpur         | 1747 | 0.48 | 1.62 | 0.48 | 2.99 | 0.48 | 4.49 | 13 | 44 | 4 | 25 | 5 | 45 |
| 102874.7301 | Mandpur         | 1742 | 0.48 | 1.62 | 0.48 | 2.98 | 0.48 | 4.48 | 13 | 44 | 4 | 25 | 5 | 45 |
| 109065.5318 | Saifpur         | 1718 | 0.47 | 1.60 | 0.47 | 2.94 | 0.47 | 4.42 | 13 | 43 | 4 | 25 | 5 | 44 |
| 73257.7729  | Bhamraua        | 1677 | 0.46 | 1.56 | 0.46 | 2.87 | 0.46 | 4.31 | 12 | 42 | 4 | 24 | 5 | 43 |
| 94036.91741 | Birner_not_sure | 1667 | 0.46 | 1.55 | 0.46 | 2.85 | 0.46 | 4.28 | 12 | 42 | 4 | 24 | 5 | 43 |
| 121360.4001 | Rajatau Seupur  | 1637 | 0.45 | 1.52 | 0.45 | 2.80 | 0.45 | 4.21 | 12 | 41 | 4 | 24 | 5 | 42 |
| 74166.68998 | Kirthala        | 1595 | 0.44 | 1.48 | 0.44 | 2.73 | 0.44 | 4.10 | 12 | 40 | 4 | 23 | 4 | 41 |
| 81920.46918 |                 | 1573 | 0.43 | 1.46 | 0.43 | 2.69 | 0.43 | 4.04 | 12 | 39 | 4 | 23 | 4 | 40 |
| 77657.32379 | Tochhi          | 1549 | 0.43 | 1.44 | 0.43 | 2.65 | 0.43 | 3.98 | 12 | 39 | 4 | 23 | 4 | 40 |
| 78374.74628 |                 | 1539 | 0.42 | 1.43 | 0.42 | 2.63 | 0.42 | 3.96 | 11 | 39 | 4 | 22 | 4 | 40 |
| 82302.25137 | Malahpur        | 1534 | 0.42 | 1.43 | 0.42 | 2.62 | 0.42 | 3.94 | 11 | 39 | 4 | 22 | 4 | 39 |
| 0           |                 | 1504 | 0.41 | 1.40 | 0.41 | 2.57 | 0.41 | 3.87 | 11 | 38 | 4 | 22 | 4 | 39 |
| 81893.22143 |                 | 1449 | 0.40 | 1.35 | 0.40 | 2.48 | 0.40 | 3.72 | 11 | 36 | 3 | 21 | 4 | 37 |
| 80705.99433 | Kunjalpur       | 1427 | 0.39 | 1.33 | 0.39 | 2.44 | 0.39 | 3.67 | 11 | 36 | 3 | 21 | 4 | 37 |
| 64884.84423 | Bhamsoi         | 1411 | 0.39 | 1.31 | 0.39 | 2.41 | 0.39 | 3.63 | 10 | 35 | 3 | 21 | 4 | 36 |
| 64884.84423 | Husainpur       | 1411 | 0.39 | 1.31 | 0.39 | 2.41 | 0.39 | 3.63 | 10 | 35 | 3 | 21 | 4 | 36 |
| 60680.364   | Lahaski         | 1407 | 0.39 | 1.31 | 0.39 | 2.41 | 0.39 | 3.62 | 10 | 35 | 3 | 20 | 4 | 36 |
| 75385.10919 |                 | 1394 | 0.38 | 1.30 | 0.38 | 2.38 | 0.38 | 3.58 | 10 | 35 | 3 | 20 | 4 | 36 |
| 31918.00023 | Pahar           | 1387 | 0.38 | 1.29 | 0.38 | 2.37 | 0.38 | 3.56 | 10 | 35 | 3 | 20 | 4 | 36 |
| 52694.62402 | Garhi_not_sure  | 1387 | 0.38 | 1.29 | 0.38 | 2.37 | 0.38 | 3.56 | 10 | 35 | 3 | 20 | 4 | 36 |
| 52694.62402 |                 | 1326 | 0.36 | 1.23 | 0.36 | 2.27 | 0.36 | 3.41 | 10 | 33 | 3 | 19 | 4 | 34 |
| 93154.48153 | Kanakpur        | 1321 | 0.36 | 1.23 | 0.36 | 2.26 | 0.36 | 3.39 | 10 | 33 | 3 | 19 | 4 | 34 |
| 64480.9826  | Dhurra Todarpur | 1321 | 0.36 | 1.23 | 0.36 | 2.26 | 0.36 | 3.39 | 10 | 33 | 3 | 19 | 4 | 34 |
| 73231.26032 | Gijrauli        | 1300 | 0.36 | 1.21 | 0.36 | 2.22 | 0.36 | 3.34 | 10 | 33 | 3 | 19 | 4 | 33 |
| 83525.40944 |                 | 1298 | 0.36 | 1.21 | 0.36 | 2.22 | 0.36 | 3.34 | 10 | 33 | 3 | 19 | 4 | 33 |
| 63853.07542 |                 | 1284 | 0.35 | 1.19 | 0.35 | 2.20 | 0.35 | 3.30 | 10 | 32 | 3 | 19 | 4 | 33 |
| 54957.77181 | Madhupur        | 1280 | 0.35 | 1.19 | 0.35 | 2.19 | 0.35 | 3.29 | 10 | 32 | 3 | 19 | 4 | 33 |
| 0           | Birsinghpur     | 1277 | 0.35 | 1.19 | 0.35 | 2.18 | 0.35 | 3.28 | 9  | 32 | 3 | 19 | 4 | 33 |

|             |                       |      |      |      |      |      |      |      |   |    |   |    |   |    |
|-------------|-----------------------|------|------|------|------|------|------|------|---|----|---|----|---|----|
| 46149.16345 | Mujaffarnagar         | 1270 | 0.35 | 1.18 | 0.35 | 2.17 | 0.35 | 3.26 | 9 | 32 | 3 | 18 | 3 | 33 |
| 85527.24112 | Shekhupur             | 1269 | 0.35 | 1.18 | 0.35 | 2.17 | 0.35 | 3.26 | 9 | 32 | 3 | 18 | 3 | 33 |
| 55814.71224 | Asharfabad            | 1262 | 0.35 | 1.17 | 0.35 | 2.16 | 0.35 | 3.24 | 9 | 32 | 3 | 18 | 3 | 32 |
| 68553.59233 |                       | 1236 | 0.34 | 1.15 | 0.34 | 2.11 | 0.34 | 3.18 | 9 | 31 | 3 | 18 | 3 | 32 |
| 54595.74709 |                       | 1181 | 0.32 | 1.10 | 0.32 | 2.02 | 0.32 | 3.04 | 9 | 30 | 3 | 17 | 3 | 30 |
| 71661.45325 | Pesari                | 1172 | 0.32 | 1.09 | 0.32 | 2.00 | 0.32 | 3.01 | 9 | 29 | 3 | 17 | 3 | 30 |
| 59758.80711 | Nagla Rampur          | 1170 | 0.32 | 1.09 | 0.32 | 2.00 | 0.32 | 3.01 | 9 | 29 | 3 | 17 | 3 | 30 |
| 71601.43929 | Girdharpur            | 1169 | 0.32 | 1.09 | 0.32 | 2.00 | 0.32 | 3.00 | 9 | 29 | 3 | 17 | 3 | 30 |
| 57450.43207 | Hamidpur              | 1152 | 0.32 | 1.07 | 0.32 | 1.97 | 0.32 | 2.96 | 9 | 29 | 3 | 17 | 3 | 30 |
| 68522.78351 |                       | 1140 | 0.31 | 1.06 | 0.31 | 1.95 | 0.31 | 2.93 | 8 | 29 | 3 | 17 | 3 | 29 |
| 56842.72682 | Rampur Gosai          | 1111 | 0.31 | 1.03 | 0.31 | 1.90 | 0.31 | 2.86 | 8 | 28 | 3 | 16 | 3 | 29 |
| 96816.80155 | Noratha               | 1108 | 0.30 | 1.03 | 0.30 | 1.89 | 0.30 | 2.85 | 8 | 28 | 3 | 16 | 3 | 28 |
| 69467.07239 | Khedia Ta<br>Lohgarh  | 1102 | 0.30 | 1.02 | 0.30 | 1.88 | 0.30 | 2.83 | 8 | 28 | 3 | 16 | 3 | 28 |
| 71138.56599 |                       | 1092 | 0.30 | 1.02 | 0.30 | 1.87 | 0.30 | 2.81 | 8 | 27 | 3 | 16 | 3 | 28 |
| 65484.62085 | Kamalpur              | 1076 | 0.30 | 1.00 | 0.30 | 1.84 | 0.30 | 2.77 | 8 | 27 | 3 | 16 | 3 | 28 |
| 64280.11881 | Nagar                 | 1070 | 0.29 | 1.00 | 0.29 | 1.83 | 0.29 | 2.75 | 8 | 27 | 3 | 16 | 3 | 27 |
| 41473.11775 |                       | 1058 | 0.29 | 0.98 | 0.29 | 1.81 | 0.29 | 2.72 | 8 | 27 | 2 | 15 | 3 | 27 |
| 45149.26752 | Nagla Khिताuli        | 1045 | 0.29 | 0.97 | 0.29 | 1.79 | 0.29 | 2.69 | 8 | 26 | 2 | 15 | 3 | 27 |
| 30598.74526 | Nagla Kosalpuri       | 937  | 0.26 | 0.87 | 0.26 | 1.60 | 0.26 | 2.41 | 7 | 24 | 2 | 14 | 3 | 24 |
| 50619.55309 | Tandoli Jahan<br>Khan | 884  | 0.24 | 0.82 | 0.24 | 1.51 | 0.24 | 2.27 | 7 | 22 | 2 | 13 | 2 | 23 |
| 40804.47541 | Jadaupur              | 880  | 0.24 | 0.82 | 0.24 | 1.50 | 0.24 | 2.26 | 7 | 22 | 2 | 13 | 2 | 23 |
| 51323.02594 |                       | 879  | 0.24 | 0.82 | 0.24 | 1.50 | 0.24 | 2.26 | 7 | 22 | 2 | 13 | 2 | 23 |
| 33733.76669 |                       | 865  | 0.24 | 0.80 | 0.24 | 1.48 | 0.24 | 2.22 | 6 | 22 | 2 | 13 | 2 | 22 |
| 47170.46007 | Rustam agar           | 858  | 0.24 | 0.80 | 0.24 | 1.47 | 0.24 | 2.21 | 6 | 22 | 2 | 12 | 2 | 22 |
| 40566.5561  |                       | 831  | 0.23 | 0.77 | 0.23 | 1.42 | 0.23 | 2.14 | 6 | 21 | 2 | 12 | 2 | 21 |
| 80841.96565 | Man Garhi             | 822  | 0.23 | 0.76 | 0.23 | 1.41 | 0.23 | 2.11 | 6 | 21 | 2 | 12 | 2 | 21 |
| 36424.09755 | Khedia Dhaukal        | 814  | 0.22 | 0.76 | 0.22 | 1.39 | 0.22 | 2.09 | 6 | 20 | 2 | 12 | 2 | 21 |
| 71538.30164 |                       | 797  | 0.22 | 0.74 | 0.22 | 1.36 | 0.22 | 2.05 | 6 | 20 | 2 | 12 | 2 | 20 |
| 58329.31161 | Nagla Sadak           | 782  | 0.22 | 0.73 | 0.22 | 1.34 | 0.22 | 2.01 | 6 | 20 | 2 | 11 | 2 | 20 |
| 38202.8568  |                       | 776  | 0.21 | 0.72 | 0.21 | 1.33 | 0.21 | 1.99 | 6 | 19 | 2 | 11 | 2 | 20 |
| 35521.71955 |                       | 776  | 0.21 | 0.72 | 0.21 | 1.33 | 0.21 | 1.99 | 6 | 19 | 2 | 11 | 2 | 20 |
| 55979.25395 |                       | 776  | 0.21 | 0.72 | 0.21 | 1.33 | 0.21 | 1.99 | 6 | 19 | 2 | 11 | 2 | 20 |
| 50771.84907 | Shahpur Kotra         | 748  | 0.21 | 0.70 | 0.21 | 1.28 | 0.21 | 1.92 | 6 | 19 | 2 | 11 | 2 | 19 |
| 50038.89481 |                       | 701  | 0.19 | 0.65 | 0.19 | 1.20 | 0.19 | 1.80 | 5 | 18 | 2 | 10 | 2 | 18 |

|             |                           |     |      |      |      |      |      |      |   |    |   |    |   |    |
|-------------|---------------------------|-----|------|------|------|------|------|------|---|----|---|----|---|----|
| 56357.17907 |                           | 694 | 0.19 | 0.65 | 0.19 | 1.19 | 0.19 | 1.78 | 5 | 17 | 2 | 10 | 2 | 18 |
| 48829.68629 | Nagla Jivaram             | 693 | 0.19 | 0.64 | 0.19 | 1.19 | 0.19 | 1.78 | 5 | 17 | 2 | 10 | 2 | 18 |
| 25716.05858 |                           | 653 | 0.18 | 0.61 | 0.18 | 1.12 | 0.18 | 1.68 | 5 | 16 | 2 | 9  | 2 | 17 |
| 35922.73788 |                           | 639 | 0.18 | 0.59 | 0.18 | 1.09 | 0.18 | 1.64 | 5 | 16 | 1 | 9  | 2 | 16 |
| 46702.71889 |                           | 604 | 0.17 | 0.56 | 0.17 | 1.03 | 0.17 | 1.55 | 4 | 15 | 1 | 9  | 2 | 16 |
| 38557.7605  |                           | 598 | 0.16 | 0.56 | 0.16 | 1.02 | 0.16 | 1.54 | 4 | 15 | 1 | 9  | 2 | 15 |
| 34357.99491 |                           | 591 | 0.16 | 0.55 | 0.16 | 1.01 | 0.16 | 1.52 | 4 | 15 | 1 | 9  | 2 | 15 |
| 27680.57834 |                           | 570 | 0.16 | 0.53 | 0.16 | 0.97 | 0.16 | 1.46 | 4 | 14 | 1 | 8  | 2 | 15 |
| 23418.03643 | Gangabas                  | 562 | 0.15 | 0.52 | 0.15 | 0.96 | 0.15 | 1.44 | 4 | 14 | 1 | 8  | 2 | 14 |
| 33563.73128 |                           | 550 | 0.15 | 0.51 | 0.15 | 0.94 | 0.15 | 1.41 | 4 | 14 | 1 | 8  | 2 | 14 |
| 43905.06757 | Khera Khijarpur           | 540 | 0.15 | 0.50 | 0.15 | 0.92 | 0.15 | 1.39 | 4 | 14 | 1 | 8  | 1 | 14 |
| 17871.40124 | Inayatpur Kasba           | 524 | 0.14 | 0.49 | 0.14 | 0.90 | 0.14 | 1.35 | 4 | 13 | 1 | 8  | 1 | 13 |
| 35870.84601 |                           | 515 | 0.14 | 0.48 | 0.14 | 0.88 | 0.14 | 1.32 | 4 | 13 | 1 | 7  | 1 | 13 |
| 50306.05769 | Mahaka                    | 512 | 0.14 | 0.48 | 0.14 | 0.88 | 0.14 | 1.32 | 4 | 13 | 1 | 7  | 1 | 13 |
| 43076.14951 | Valipur                   | 489 | 0.13 | 0.45 | 0.13 | 0.84 | 0.13 | 1.26 | 4 | 12 | 1 | 7  | 1 | 13 |
| 0           |                           | 485 | 0.13 | 0.45 | 0.13 | 0.83 | 0.13 | 1.25 | 4 | 12 | 1 | 7  | 1 | 12 |
| 46634.7431  |                           | 474 | 0.13 | 0.44 | 0.13 | 0.81 | 0.13 | 1.22 | 4 | 12 | 1 | 7  | 1 | 12 |
| 17792.20072 | Nagla Shyampur            | 449 | 0.12 | 0.42 | 0.12 | 0.77 | 0.12 | 1.15 | 3 | 11 | 1 | 7  | 1 | 12 |
| 34800.51002 | Mahera                    | 435 | 0.12 | 0.40 | 0.12 | 0.74 | 0.12 | 1.12 | 3 | 11 | 1 | 6  | 1 | 11 |
| 26663.11023 |                           | 419 | 0.12 | 0.39 | 0.12 | 0.72 | 0.12 | 1.08 | 3 | 11 | 1 | 6  | 1 | 11 |
| 24557.72161 | Nagla Malah               | 417 | 0.11 | 0.39 | 0.11 | 0.71 | 0.11 | 1.07 | 3 | 10 | 1 | 6  | 1 | 11 |
| 28175.34323 |                           | 385 | 0.11 | 0.36 | 0.11 | 0.66 | 0.11 | 0.99 | 3 | 10 | 1 | 6  | 1 | 10 |
| 37832.68744 |                           | 385 | 0.11 | 0.36 | 0.11 | 0.66 | 0.11 | 0.99 | 3 | 10 | 1 | 6  | 1 | 10 |
| 41517.19971 |                           | 371 | 0.10 | 0.35 | 0.10 | 0.63 | 0.10 | 0.95 | 3 | 9  | 1 | 5  | 1 | 10 |
| 0           | Nagla Pritam              | 364 | 0.10 | 0.34 | 0.10 | 0.62 | 0.10 | 0.94 | 3 | 9  | 1 | 5  | 1 | 9  |
| 62959.37622 | Mahawali Muhi<br>Uddinpur | 355 | 0.10 | 0.33 | 0.10 | 0.61 | 0.10 | 0.91 | 3 | 9  | 1 | 5  | 1 | 9  |
| 19768.84177 |                           | 343 | 0.09 | 0.32 | 0.09 | 0.59 | 0.09 | 0.88 | 3 | 9  | 1 | 5  | 1 | 9  |
| 40922.3187  |                           | 343 | 0.09 | 0.32 | 0.09 | 0.59 | 0.09 | 0.88 | 3 | 9  | 1 | 5  | 1 | 9  |
| 17044.90322 |                           | 330 | 0.09 | 0.31 | 0.09 | 0.56 | 0.09 | 0.85 | 2 | 8  | 1 | 5  | 1 | 8  |
| 29721.12509 |                           | 330 | 0.09 | 0.31 | 0.09 | 0.56 | 0.09 | 0.85 | 2 | 8  | 1 | 5  | 1 | 8  |
| 19618.33057 |                           | 302 | 0.08 | 0.28 | 0.08 | 0.52 | 0.08 | 0.78 | 2 | 8  | 1 | 4  | 1 | 8  |
| 15909.55098 |                           | 261 | 0.07 | 0.24 | 0.07 | 0.45 | 0.07 | 0.67 | 2 | 7  | 1 | 4  | 1 | 7  |
| 0           | Nagla Bhur                | 261 | 0.07 | 0.24 | 0.07 | 0.45 | 0.07 | 0.67 | 2 | 7  | 1 | 4  | 1 | 7  |
| 30882.36909 |                           | 247 | 0.07 | 0.23 | 0.07 | 0.42 | 0.07 | 0.63 | 2 | 6  | 1 | 4  | 1 | 6  |

|             |                 |       |               |               |               |               |               |               |                |                |                |                |                |                |
|-------------|-----------------|-------|---------------|---------------|---------------|---------------|---------------|---------------|----------------|----------------|----------------|----------------|----------------|----------------|
| 18191.00865 |                 | 234   | 0.06          | 0.22          | 0.06          | 0.40          | 0.06          | 0.60          | 2              | 6              | 1              | 3              | 1              | 6              |
| 25690.10575 |                 | 192   | 0.05          | 0.18          | 0.05          | 0.33          | 0.05          | 0.49          | 1              | 5              | 0              | 3              | 1              | 5              |
| 33359.47046 | Ghagsemar       | 171   | 0.05          | 0.16          | 0.05          | 0.29          | 0.05          | 0.44          | 1              | 4              | 0              | 2              | 0              | 4              |
| 11756.21521 |                 | 165   | 0.05          | 0.15          | 0.05          | 0.28          | 0.05          | 0.42          | 1              | 4              | 0              | 2              | 0              | 4              |
| 8231.119938 |                 | 137   | 0.04          | 0.13          | 0.04          | 0.23          | 0.04          | 0.35          | 1              | 3              | 0              | 2              | 0              | 4              |
| 37136.74831 |                 | 131   | 0.04          | 0.12          | 0.04          | 0.22          | 0.04          | 0.34          | 1              | 3              | 0              | 2              | 0              | 3              |
| 8596.318748 |                 | 124   | 0.03          | 0.12          | 0.03          | 0.21          | 0.03          | 0.32          | 1              | 3              | 0              | 2              | 0              | 3              |
| 7930.119822 |                 | 96    | 0.03          | 0.09          | 0.03          | 0.16          | 0.03          | 0.25          | 1              | 2              | 0              | 1              | 0              | 2              |
| 5958.738282 |                 | 82    | 0.02          | 0.08          | 0.02          | 0.14          | 0.02          | 0.21          | 1              | 2              | 0              | 1              | 0              | 2              |
| 5839.232611 |                 | 34    | 0.01          | 0.03          | 0.01          | 0.06          | 0.01          | 0.09          | 0              | 1              | 0              | 0              | 0              | 1              |
| 78939.6872  | Gaon Khera      | 6     | 0.00          | 0.01          | 0.00          | 0.01          | 0.00          | 0.02          | 0              | 0              | 0              | 0              | 0              | 0              |
| 31410.96141 | Ahmadpur        | 6     | 0.00          | 0.01          | 0.00          | 0.01          | 0.00          | 0.02          | 0              | 0              | 0              | 0              | 0              | 0              |
| 73602.08843 | Janakpur        | 6     | 0.00          | 0.01          | 0.00          | 0.01          | 0.00          | 0.02          | 0              | 0              | 0              | 0              | 0              | 0              |
| 120569.1929 | Madhauli        | 6     | 0.00          | 0.01          | 0.00          | 0.01          | 0.00          | 0.02          | 0              | 0              | 0              | 0              | 0              | 0              |
| 7362.893399 | Jargwan_incomp  | 6     | 0.00          | 0.01          | 0.00          | 0.01          | 0.00          | 0.02          | 0              | 0              | 0              | 0              | 0              | 0              |
| 35411.84642 | Muhammadpur     | 6     | 0.00          | 0.01          | 0.00          | 0.01          | 0.00          | 0.02          | 0              | 0              | 0              | 0              | 0              | 0              |
| 41372.43991 | Badhaira_incomp | 6     | 0.00          | 0.01          | 0.00          | 0.01          | 0.00          | 0.02          | 0              | 0              | 0              | 0              | 0              | 0              |
| 113507.3786 | Barhaul_incomp  | 6     | 0.00          | 0.01          | 0.00          | 0.01          | 0.00          | 0.02          | 0              | 0              | 0              | 0              | 0              | 0              |
|             | Hardoi_incomp   | 6     | 0.00          | 0.01          | 0.00          | 0.01          | 0.00          | 0.02          | 0              | 0              | 0              | 0              | 0              | 0              |
|             |                 |       | Area_<br>Bmin | Area_<br>Bmax | Area_<br>Wmin | Area_<br>Wmax | Area_<br>Pmin | Area_<br>Pmax | Yield_<br>Bmin | Yield_<br>Bmax | Yield_<br>Wmin | Yield_<br>Wmax | Yield_<br>Pmin | Yield_<br>Pmax |
| 39137       |                 | 2,014 | 108           | 364           | 108           | 669           | 108           | 1,006         | 2,906          | 9,827          | 915            | 5,689          | 1,076          | 10,058         |
| 30985       |                 | 1,624 | 85            | 288           | 85            | 530           | 85            | 796           | 2,301          | 7,781          | 724            | 4,504          | 852            | 7,963          |
| 19733       |                 | 1,076 | 54            | 184           | 54            | 337           | 54            | 507           | 1,465          | 4,955          | 461            | 2,868          | 543            | 5,072          |

Supplementary Table S2: Cost overview bamboo WfSRC system in Aligarh (India)

| Item / Activity                                              | Unit  | INR/unit | Total in INR  | Total in USD   |
|--------------------------------------------------------------|-------|----------|---------------|----------------|
| <b>Preperation of field- 1 ha (CAPEX)</b>                    |       |          |               |                |
| Site and plant selection (soil analysis, ground water check) | 1     | 50000    | 50000         | 600            |
| Machine and worker for levelling and ploughing the field     | 1     | 63600    | 63600         | 763            |
| Fencing the field (wire fencing)                             | 1     | 150000   | 150000        | 1800           |
| Per sapling (bamboo) + transport                             | 10000 | 60       | 600000        | 7200           |
| Cost per worker (day)                                        | 300   | 450.00   | 135000        | 1620           |
| Total                                                        |       |          | <b>998600</b> | <b>11983.2</b> |
| <b>Infrastructure (CAPEX)</b>                                |       |          |               |                |

|                                                                 |      |        |                |              |
|-----------------------------------------------------------------|------|--------|----------------|--------------|
| Pond with clay lining (installed)                               | 1    | 720000 | 720000         | 8640         |
| Submerged pump (installed), 3 in 25 years                       | 3    | 125000 | 375000         | 4500         |
| Flow meter (installed), 3 in 25 years                           | 3    | 85000  | 255000         | 3060         |
| Water traps (extraction of percolation water)                   | 9    | 1600   | 14400          | 173          |
| Pressure reducer, pipes and valves (3 systems 25 years)         | 3    | 271000 | 813000         | 9756         |
| Cost per worker (day)                                           | 300  | 450.00 | 135000         | 1620         |
| Total                                                           |      |        | <b>2312400</b> | <b>27749</b> |
| <b>O&amp;M (25 years) OPEX</b>                                  |      |        |                |              |
| Maintainance-Man-days (weeding-first year, furrows, harvesting) | 2500 | 450    | 1125000        | 13500        |
| Chemicals fighting pests (e.eg. Termites)                       | 25   | 4500   | 112500         | 1350         |
| Electricity (kw/h) pump 6 h/day (12 Rs/KWh)                     | 6500 | 360    | 2340000        | 28080        |
| Equipment (maintaing /harvesting)                               | 25   | 8000   | 200000         | 2400         |
| Analysis of water samples (COD, BOD, TSS, TKN, TP)              | 25   | 25000  | 625000         | 7500         |
| Cost of supervising the system                                  | 300  | 600    | 180000         | 2160         |
| Cost of deconstruction, soil tilling                            | 1    | 75000  | 75000          | 900          |
| Total                                                           |      |        | <b>4657500</b> | <b>55890</b> |
| Cost per year (average of 25 years)                             |      |        | <b>318740</b>  | <b>3825</b>  |
